# Supplementary material
Source: HighWire-hosted journal article supplement (http://rc.rcjournal.com/highwire/filestream/23029/field_highwire_adjunct_files/0/rc-09580-File002.docx)
Supplement: rc-09580-File002.docx [file rc-09580-File002.docx]

**Supplementary Tables and Figures**

**Table S1:** Comparison of Download Apnea-Hypopnea Index at 1 week, 1 month and 6 months between iVAPS versus ST groups among Subjects with Non-bulbar onset ALS

| **Download parameters at 1 week** | **iVAPS**  **(n=5)** | **ST**  **(n=8)** | ***P*** |
| --- | --- | --- | --- |
| Apnea-hypopnea Index, events/hour | 12.1±11.6 | 8.0±9.1 | 0.48 |
| Apnea index, events/hour | 0.6±1.1 | 0.9±1.8 | 0.75 |
| Hypopnea index, events/hour | 11.5±10.8 | 7.1±7.5 | 0.39 |
| **Download parameters at 1 month** | **iVAPS**  **(n=5)** | **ST**  **(n=8)** | ***P*** |
| Apnea-hypopnea Index, events/hour | 12.3±11.1 | 5.3±4.5 | 0.24 |
| Apnea index, events/hour | 0.0±0.0 | 0.3±0.4 | 0.05 |
| Hypopnea index, events/hour | 12.3±11.1 | 5.0±4.2 | 0.22 |
| **Download parameters at 6 months** | **iVAPS**  **(n=4)** | **ST**  **(n=4)** | ***P*** |
| Apnea-hypopnea Index, events/hour | 17.4±22.8 | 4.1±3.5 | 0.33 |
| Apnea index, events/hour | 0.0±0.1 | 0.0±0.1 | 1.00 |
| Hypopnea index, events/hour | 17.4±22.9 | 4.1±3.4 | 0.33 |

**Table S2:** Comparison of Download Apnea-Hypopnea Index at 1 week, 1 month and 6 months between iVAPS versus ST groups among Subjects with Bulbar-onset ALS

| **Download parameters at 1 week** | **iVAPS**  **(n=9)** | **ST**  **(n=8)** | ***P*** |
| --- | --- | --- | --- |
| Apnea-hypopnea Index, events/hour | 18.9±3.2 | 11.0±7.2 | 0.08 |
| Apnea index, events/hour | 0.5±0.5 | 0.9±1.1 | 0.30 |
| Hypopnea index, events/hour | 18.4±9.5 | 10.1±6.4 | 0.05 |
| **Download parameters at 1 month** | **iVAPS**  **(n=9)** | **ST**  **(n=8)** | ***P*** |
| Apnea-hypopnea Index, events/hour | 18.4±8.3 | 9.7±7.0 | 0.03* |
| Apnea index, events/hour | 1.1±1.7 | 1.4±2.5 | 0.76 |
| Hypopnea index, events/hour | 17.3±8.4 | 8.3±4.9 | 0.02* |
| **Download parameters at 6 months** | **iVAPS**  **(n=7)** | **ST**  **(n=7)** | ***P*** |
| Apnea-hypopnea Index, events/hour | 13.2±9.9 | 5.0±3.6 | 0.08 |
| Apnea index, events/hour | 0.6±1.3 | 0.2±0.2 | 0.43 |
| Hypopnea index, events/hour | 12.6±8.8 | 4.8±3.5 | 0.06 |

Values are presented in means ± SD.

**P*-value < 0.05 for iVAPS versus ST

**Table S3:** Comparison of Gas Exchange from Baseline, 1-month and 6-month Follow-up between iVAPS versus ST groups

|  | **iVAPS mode** | | | | **ST mode** | | |
| --- | --- | --- | --- | --- | --- | --- | --- |
| **Daytime gas exchange** | **Baseline**  **(n=8)** | **1**  **month**  **(n=8)** | **6**  **months**  **(n=8)** | | **Baseline**  **(n=8)** | **1**  **month**  **(n=8)** | **6**  **months**  **(n=8)** |
| Daytime EtCO2, mm Hg | 36.5±9.7 | 36.5±10.8 | 36.2±6.5 | | 35.0±5.3 | 35.7±2.7 | 34.8±4.7 |
| Daytime SpO2, % | 96.9±1.8 | 95.8± 2.2 | 96.3±1.2 | | 94.4±1.6 | 95.4±2.8 | 94.7±1.8 |
| **Overnight oximetry** | **Baseline** | **1**  **month**  **(n=6)** | | **6**  **months**  **(n=6)** | **Baseline** | **1**  **month**  **(n=6)** | **6**  **months**  **(n=6)** |
| Mean SpO2, % | - | 95.7± 2.6 | | 96.3± 2.2 | - | 93.9±0.6 | 95.0±1.7 |
| Nadir SpO2, % | - | 81.0±8.8 | | 76.3± 8.1 | - | 82.5 5.2 | 81.3±9.6 |
| 4%ODI, events/hour | - | 6.4±5.0 | | 9.5±7.1 | - | 9.1±9.5 | 5.5±5.2 |
| T90%, % | - | 1.0±2.0 | | 1.5±1.4 | - | 2.0±2.5 | 1.0±1.6 |

No significant differences in any daytime and overnight gas exchange parameters at baseline, 1 month and 6 months between iVAPS and ST groups

Values are presented in means ± SD.

EtCO2 = end tidal CO2, SpO2 = oxygen saturation, 4%ODI: 4% oxygen desaturation index, T90% = total sleep time with oxygen saturation < 90%

**Table S4:** Comparison of Participant’s Sleep-Related Symptoms from Baseline to 6-month follow-up between iVAPS versus ST groups

| **Symptoms** | **iVAPS mode**  **(n=8)** | | | | **ST mode**  **(n=7)** | | | | ***P***  **(iVAPS vs.ST)** |
| --- | --- | --- | --- | --- | --- | --- | --- | --- | --- |
| **Baseline** | **6 months** | **Change** | ***P*** | **Baseline** | **6 months** | **Change** | ***P*** |
| Shortness of breath  Orthopnea  Morning headache  Daytime sleepiness  Nocturnal awakening  Difficulty falling asleep  Unrefreshing sleep  Fatigue  Irritability  Loss of Social activity  Depression | 3.0±1.5  2.5±1.3  2.7±1.9  3.6±1.3  3.4±1.1  2.0±0.8  3.1±1.6  4.0±1.1  2.1±1.5  3.2±1.4  2.9±1.3 | 3.1±1.2  3.5±1.7  2.2±1.4  3.9±1.4  4.0±0.9  2.4±1.1  3.1±1.8  4.0±1.2  2.7±1.3  3.0±1.4  2.6±1.3 | 0.1±1.6  1.0±1.9  -0.5±1.1  0.2±1.3  0.6±1.3  0.4±1.3  0.0±0.5  0.0±1.1  0.6±1.2  -0.2±0.5  -0.2±1.2 | 0.84  0.19  0.23  0.60  0.22  0.41  1.00  1.00  0.18  0.17  0.56 | 2.9±1.2  2.1±0.9  2.4±1.6  4.0±1.4  3.1±0.7  2.3±0.8  3.5±1.4  3.8±1.5  2.0±0.9  2.8±1.0  2.7±0.8 | 2.9±1.8  3.1±1.6  2.3±1.5  4.0±1.5  3.1±1.2  2.9±1.2  3.0±1.4  3.7±1.7  2.5±1.4  2.8±1.6  2.7±1.0 | 0.0±0.8  1.0±1.1  -0.1±1.2  0.0±0.8  0.0±0.8  0.6±1.7  -0.5±0.8  -0.1±1.0  0.5±0.8  0.0±1.1  0.0±1.3 | 1.00  0.06  0.77  1.00  1.00  0.41  0.20  0.69  0.20  1.00  1.00 | 0.95  1.00  0.55  0.66  0.29  0.86  0.20  0.77  0.83  0.57  0.71 |

Values are presented in means ± SD.

Scores on the symptom’s questionnaires range from 1 to 5, with higher scores indicating more severe symptoms.

**Table S5:** Comparison of the Severe Respiratory Insufficiency (SRI) from Baseline to 3-month follow-up between iVAPS versus ST groups

| **Severe respiratory insufficiency** | **iVAPS mode**  **(n=7)** | | | | **ST mode**  **(n=6)** | | | | ***P***  **(iVAPS vs.ST)** |
| --- | --- | --- | --- | --- | --- | --- | --- | --- | --- |
| **Baseline** | **3 months** | **Change** | ***P*** | **Baseline** | **3 months** | **Change** | ***P*** |
| Respiratory complaint  Physical functioning  Attendant Symptoms  Social Relationships  Anxiety  Psychological wellbeing  Social Functioning | 50.4±24.6  40.5±20.8  45.4±26.4  71.4±19.0  55.7±29.3  46.8±25.2  52.2±23.8 | 54.5±28.0  33.3±27.6  44.4±28.7  63.1±13.3  45.0±21.0  47.2±27.9  49.5±23.2 | 4.0±13.7  -7.1±11.2  -1.0±16.7  -8.3±9.0  -10.7±16.7  0.4±11.7  -2.7±18.5 | 0.47  0.14  0.88  0.05  0.14  0.93  0.71 | 51.0±15.4  20.8±14.9  45.8±17.7  65.3±9.0  50.0±7.1  56.9±20.2  36.5±14.7 | 29.7±16.3  7.6±4.1  46.4±21.3  54.2±22.3  33.3±24.0  52.8±30.0  24.5±14.8 | -21.3±10.5  -13.2±13.3  0.6±19.2  -11.1±14.3  -16.7±27.3  -4.2±18.1  -12.0±14.4 | <0.01  0.06  0.94  0.12  0.19  0.60  0.10 | <0.01*  0.39  0.87  0.68  0.64  0.59  0.34 |

Values are presented in means ± SD.

**P*-value < 0.01 for iVAPS versus ST

Scores on the SRI range from 0 to 100, with higher scores indicating a better quality of life.

**Table S6:** Comparison of Participants-Reported Ventilator Satisfaction from Baseline to 6-month follow-up between iVAPS versus ST groups

| **Participants-Reported**  **Ventilator Satisfaction** | **iVAPS mode**  **(n=9)** | | | | **ST mode**  **(n=6)** | | | | ***P***  **(iVAPS vs.ST)** |
| --- | --- | --- | --- | --- | --- | --- | --- | --- | --- |
| **1 month** | **6 months** | **Change** | ***P*** | **1 month** | **6 months** | **Change** | ***P*** |
| Ventilator easy to use  Comfort breathing  Noise of ventilator  Number of alarms/night  Perceived asynchrony  Ventilator satisfaction overall | 1.6±0.5  2.4±1.4  2.1±0.8  0.5±0.9  2.6±1.1  2.1±0.6 | 1.7±0.5  2.4±0.7  2.4±1.0  1.6±2.1  2.3±1.0  2.2±0.7 | 0.1±0.8  0.0±1.4  0.3±0.7  1.1±1.9  -0.3±1.3  0.1±0.6 | 0.68  1.00  0.19  0.11  0.62  0.59 | 1.3±0.5  2.0±1.1  2.0±0.6  1.3±1.0  2.5±0.5  2.0±1.3 | 1.2±0.7  2.5±1.2  1.7±1.0  1.5±1.7  1.7±1.0  2.3±1.7 | -0.1±1.0  0.5±0.5  -0.3±1.6  0.2±1.2  -0.8±1.5  0.3±1.5 | 0.69  0.08  0.64  0.74  0.22  0.61 | 0.55  0.43  0.29  0.30  0.41  0.69 |

Values are presented in means ± SD.

Scores on the ventilator comfort questionnaires range from 1 to 5, with higher scores indicating worse outcomes.

**Figure S1:** Correlation plots between apnea-hypopnea index and the difference between

95th percentile and median inspiratory positive airway pressure (delta IPAP) or the difference between 95th percentile and median tidal volume (delta tidal volume) for subjects with iVAPS


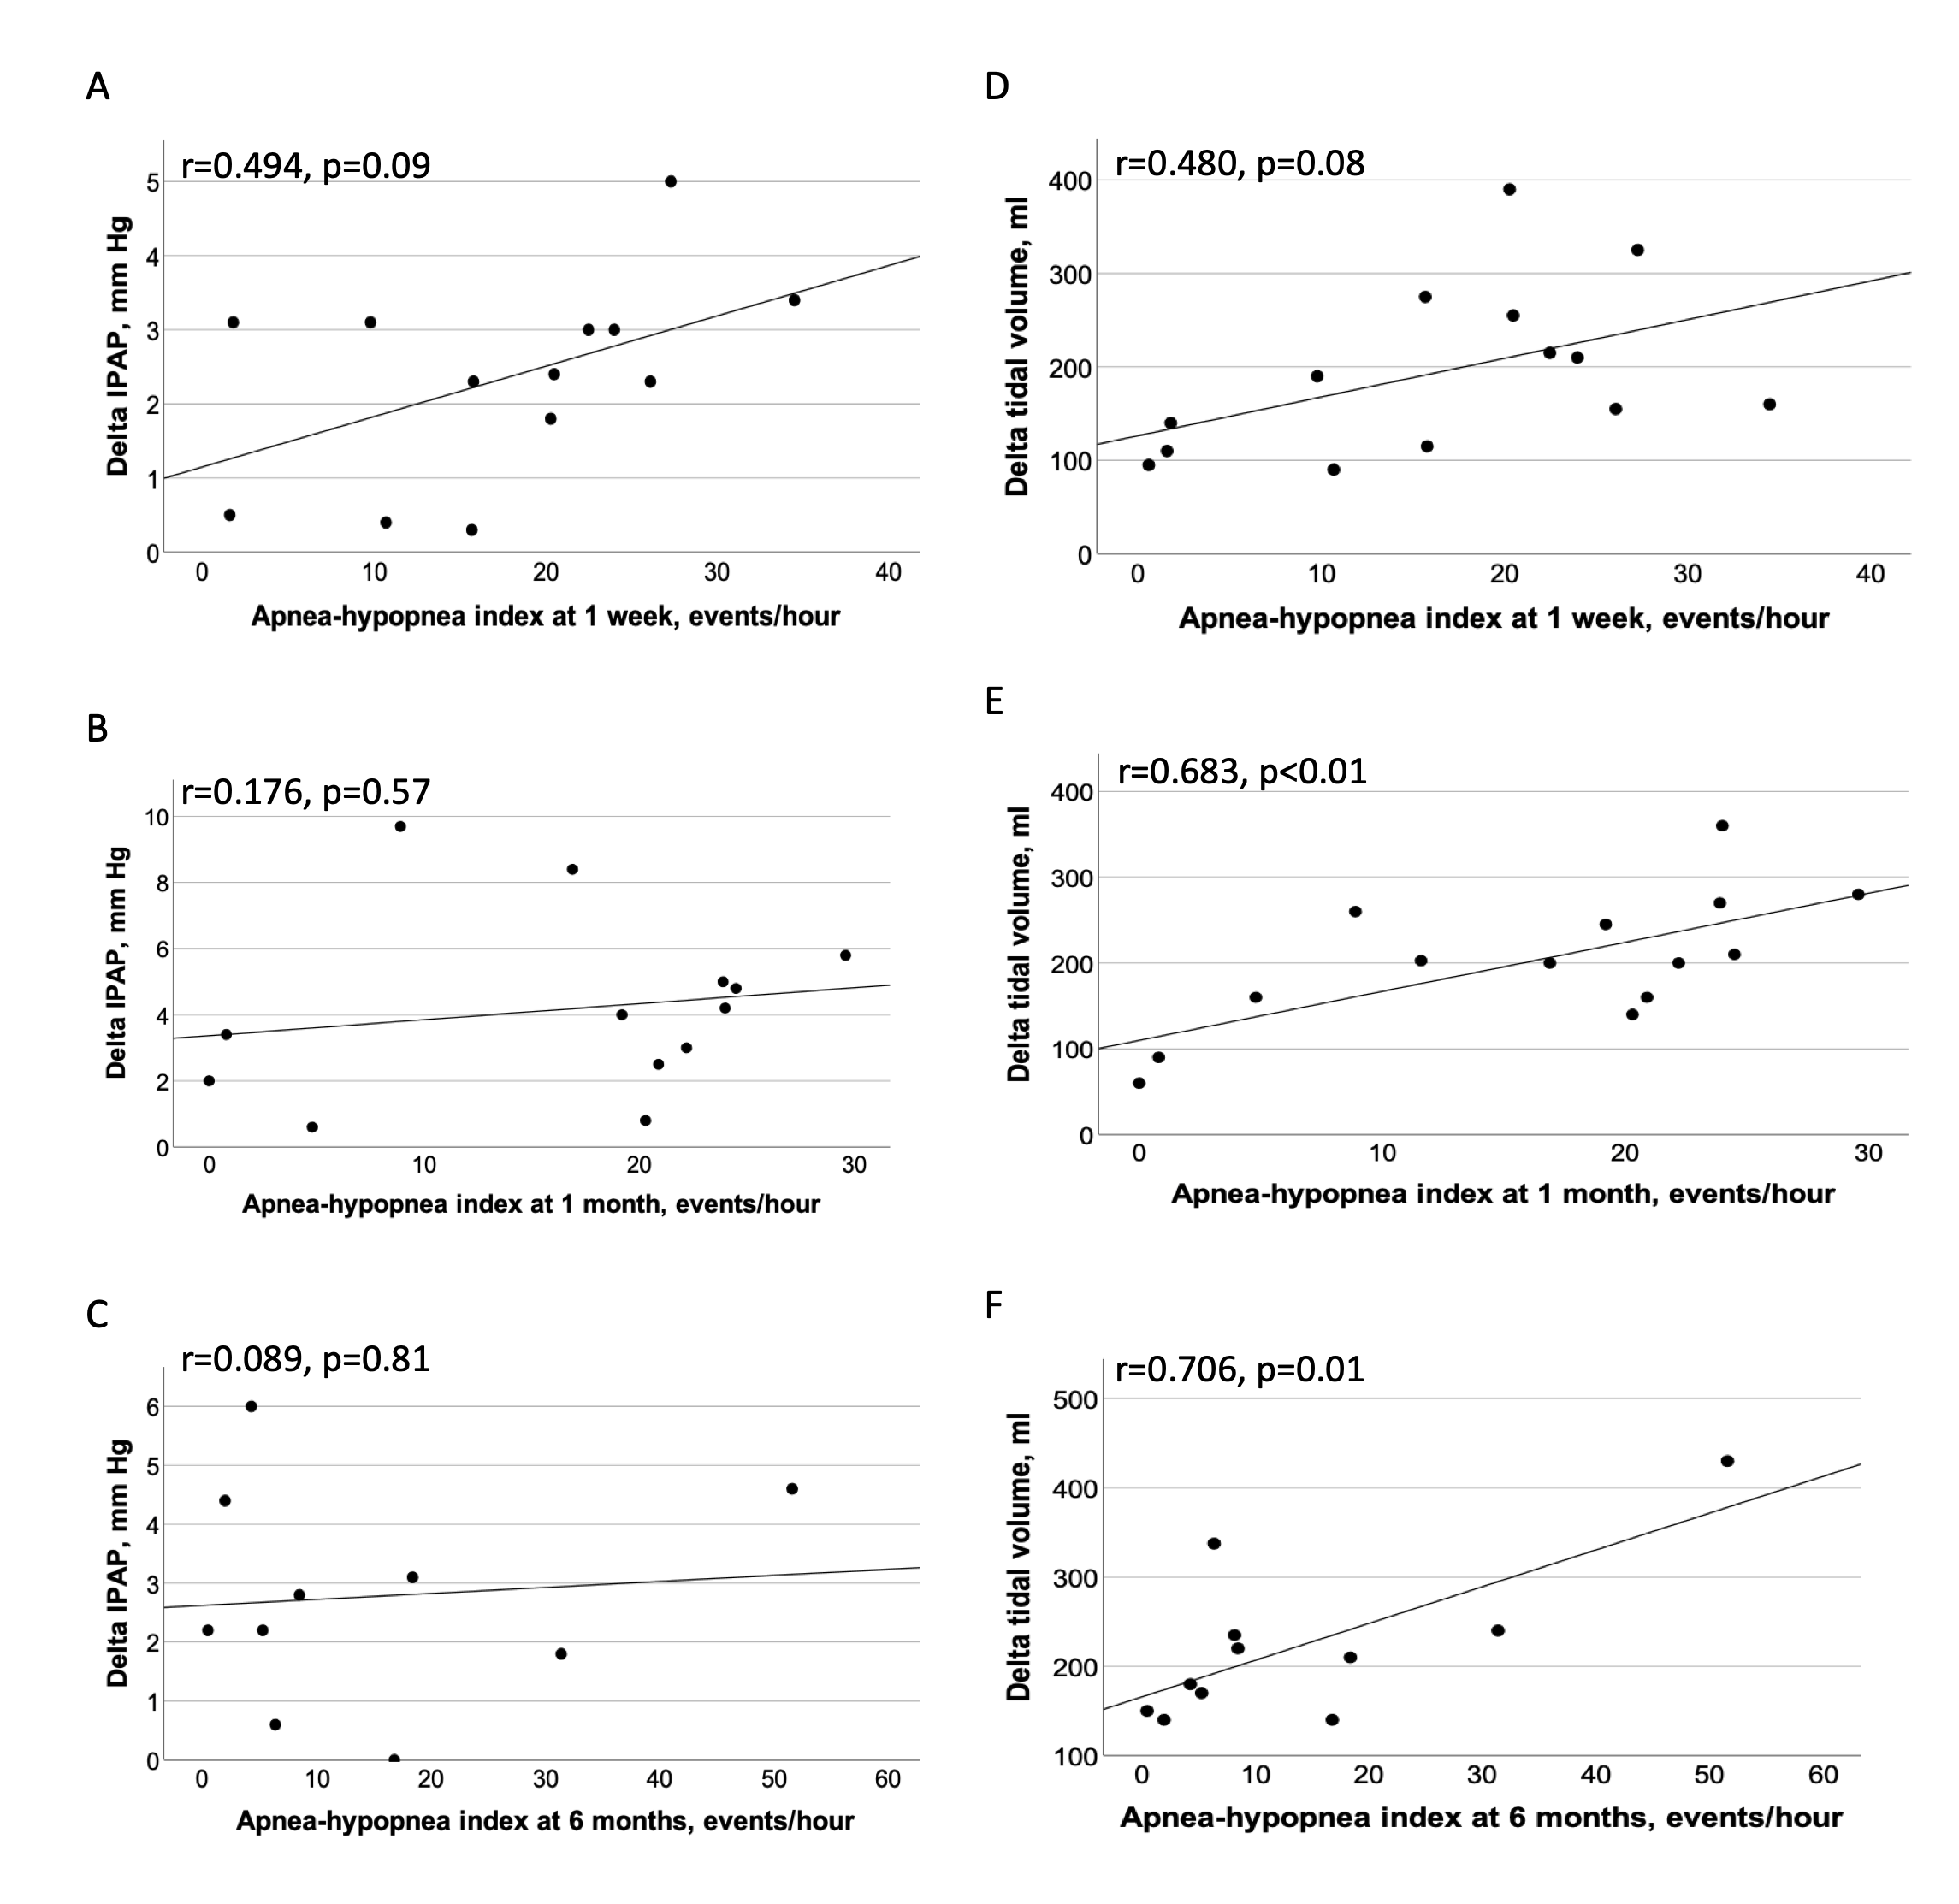


(A, B, C)-correlation plots between AHI and delta IPAP at 1 week, 1 month and 6 months

(D, E, F)-correlation plots between AHI and delta tidal volume at 1 week, 1 month and 6 months

r = Pearson’s correlation coefficient

Delta IPAP = the difference between 95th percentile and median inspiratory positive airway pressure, Delta tidal volume = the difference between 95th percentile and median tidal volume
